# Supplementary material for: Whole-Genome Differentially Hydroxymethylated DNA Regions among Twins Discordant for Cardiovascular Death
Source: MDPI journal article supplement (doi:10.3390/genes12081183), 2021-07-29
Supplement: s1 [file s1]

**Supplementary Table S1. Characteristics at exam 3 (1986-1987) of twin pairs discordant for cardiovascular death<sup>1</sup>**

| Characteristics                                        | CVD-dMZ (n=19 pairs) |            |               |                      | CVD-dDZ (n=19 pairs) |            |               |                      |
|--------------------------------------------------------|----------------------|------------|---------------|----------------------|----------------------|------------|---------------|----------------------|
|                                                        | Total                | Case Twins | Control Twins | P value <sup>2</sup> | Total                | Case Twins | Control Twins | P Value <sup>2</sup> |
| Discordant pairs, n                                    | 19                   | 19         | 19            | –                    | 19                   | 19         | 19            | –                    |
| Age at exam 3 (y)                                      | 65.4 (2.5)           | 65.4 (2.5) | 65.4 (2.5)    | 1.00                 | 64.9 (3.2)           | 64.9 (3.2) | 64.9 (3.2)    | 1.00                 |
| Age at death (y)                                       | 79.0 (7.9)           | 74.3 (5.7) | 83.7 (7.1)    | <0.0001              | 80.6 (7.1)           | 76.7 (5.2) | 84.5 (6.7)    | <0.0001              |
| Cigarette smoking, n (%)                               |                      |            |               | 0.21                 |                      |            |               | 0.96                 |
| Never smokers                                          | 9 (24)               | 3 (16)     | 6 (32)        |                      | 7 (19)               | 3 (16)     | 4 (22)        |                      |
| Former smokers                                         | 24 (63)              | 13 (68)    | 11 (58)       |                      | 23 (62)              | 11 (58)    | 12 (67)       |                      |
| Current smokers                                        | 5 (13)               | 3 (16)     | 2 (10)        |                      | 7 (19)               | 5 (26)     | 2 (11)        |                      |
| Education, <sup>3</sup> (y)                            | 13.9 (2.6)           | 14.2 (3.1) | 13.6 (2.2)    | 0.36                 | 12.2 (3.0)           | 11.9 (2.8) | 12.5 (3.1)    | 0.23                 |
| Body mass index (kg/m <sup>2</sup> )                   | 28.2 (3.6)           | 28.0 (3.4) | 28.4 (3.7)    | 0.39                 | 26.8 (3.8)           | 26.9 (4.1) | 26.7 (3.7)    | 0.83                 |
| Obesity, n (%)                                         | 9 (24)               | 5 (26)     | 4 (21)        | 0.66                 | 6 (16)               | 3 (16)     | 3 (16)        | 0.97                 |
| Systolic blood pressure (mm Hg)                        | 137 (14)             | 139 (13)   | 135 (14)      | 0.20                 | 136 (12)             | 138 (14)   | 134 (8)       | 0.24                 |
| Diastolic blood pressure (mm Hg)                       | 83 (7)               | 82 (7)     | 85 (6)        | 0.13                 | 84 (8)               | 85 (8)     | 83 (8)        | 0.40                 |
| Plasma biochemistry                                    |                      |            |               |                      |                      |            |               |                      |
| Total cholesterol (mg/dL) <sup>4</sup>                 | 232 (37)             | 223 (35)   | 241 (38)      | 0.04                 | 214 (39)             | 215 (35)   | 213 (43)      | 0.87                 |
| Triglyceride (mg/dL) <sup>5</sup>                      | 163 (75)             | 172 (90)   | 153 (56)      | 0.26                 | 148 (83)             | 157 (84)   | 193 (83)      | 0.35                 |
| HDL-C (mg/dL) <sup>4</sup>                             | 43 (11)              | 42 (11)    | 44 (10)       | 0.44                 | 44 (13)              | 44 (14)    | 44 (11)       | 0.86                 |
| LDL-C (mg/dL) <sup>4</sup>                             | 157 (33)             | 146 (29)   | 166 (36)      | 0.013                | 145 (35)             | 143 (32)   | 147 (37)      | 0.69                 |
| Postload glucose (mg/dL) <sup>6</sup>                  | 186 (33)             | 190 (27)   | 182 (38)      | 0.50                 | 179 (60)             | 186 (65)   | 173 (55)      | 0.46                 |
| Diabetes, n (%)                                        | 8 (21)               | 5 (26)     | 3 (16)        | 0.41                 | 9 (24)               | 6 (32)     | 3 (16)        | 0.22                 |
| Use of cholesterol-lowering medicine, n (%)            | 0 (0)                | 0 (0)      | 0 (0)         | 1.00                 | 1 (0.3)              | 1 (0.5)    | 0 (0)         | 1.00                 |
| Use of antihypertensives, n (%)                        | 16 (42)              | 9 (47)     | 7 (37)        | 0.35                 | 14 (37)              | 10 (53)    | 4 (21)        | 0.08                 |
| Peripheral blood leukocyte composition, <sup>7</sup> % |                      |            |               |                      | N/A                  | N/A        | N/A           |                      |
| CD8+ T-cells                                           | 2.6 (3.2)            | 3.0 (3.7)  | 2.2 (2.7)     | 0.44                 | –                    | –          | –             |                      |
| CD4+ T-cells                                           | 13.9 (5.7)           | 13.0 (5.4) | 14.8 (5.9)    | 0.11                 | –                    | –          | –             |                      |
| Natural killer cells                                   | 5.6 (4.1)            | 5.7 (4.6)  | 5.6 (3.8)     | 0.87                 | –                    | –          | –             |                      |
| B-cells                                                | 4.1 (1.8)            | 4.1 (2.1)  | 4.1 (1.6)     | 0.94                 | –                    | –          | –             |                      |
| Monocytes                                              | 7.1 (3.2)            | 7.0 (2.9)  | 7.1 (3.4)     | 0.91                 | –                    | –          | –             |                      |
| Granulocytes                                           | 68.3 (7.9)           | 68.7 (8.8) | 67.9 (7.0)    | 0.69                 | –                    | –          | –             |                      |

**Abbreviations:** CVD-dMZ= monozygotic twin pairs discordant for CVD death; CVD-dDZ= dizygotic twin pairs discordant for CVD death; HDL-C=high-density lipoprotein cholesterol; LDL-C= low-density lipoprotein cholesterol

<sup>1</sup>data at exam 3 are presented as mean (SD) unless otherwise specified. Raw values for continuous variables are presented.

<sup>2</sup>case twins versus their co-twin brothers (controls).

<sup>3</sup>from baseline exam (exam 1)

<sup>4</sup>to convert mg/dl of total cholesterol, HDL or LDL cholesterol to mmol/l, divide by 38.67

<sup>5</sup>to convert mg/dl of triglycerides to mmol/l, divided by 88.5.

<sup>6</sup>to convert mg/dl of glucose to mmol/l, divided by 18.02.

<sup>7</sup>estimated from methylation data

**Supplementary Table S2. Characterization of differentially hydroxymethylated region among the discovery sample of monozygotic twin pairs discordant for cardiovascular death (N=12 pairs)**

|                            | Total DhMRs <sup>4</sup><br>(n) | DhMR Features                        |                    |                   |                           | DhMR Coverage, bp        |             |            |
|----------------------------|---------------------------------|--------------------------------------|--------------------|-------------------|---------------------------|--------------------------|-------------|------------|
|                            |                                 | Consistent DhMRs <sup>5</sup><br>(n) | Hyper-DhMRs<br>(n) | Hypo-DhMRs<br>(n) | Size, Mean<br>(range), bp | Total DhMRs <sup>4</sup> | Hyper-DhMRs | Hypo-DhMRs |
| <b>Model 1<sup>1</sup></b> | 16,232                          |                                      | 12,262             | 3,970             | 262<br>(150 -950)         | 4,264,650                | 3,209,400   | 1,055,250  |
| <b>Model 2<sup>2</sup></b> | 6,438                           | 1,893                                | 5,264              | 1,174             | 232<br>(150-950)          | 1,497,950                | 1,229,500   | 268,450    |
| <b>Model 3<sup>3</sup></b> | 7,864                           |                                      | 6,411              | 1,453             | 228<br>(150-950)          | 1,789,550                | 1,463,950   | 325,600    |

**Abbreviations:** DhMRs=differentially hydroxymethylated regions; hyper-DhMRs = differentially hyper-hydroxymethylated regions (case twins vs. control twins); hypo-DhMRs = differentially hypo-hydroxymethylated regions (case twins vs. control twins)

<sup>1</sup>does not adjust for any covariates while naturally adjust for germline and environmental factors shared between monozygotic co-twins

<sup>2</sup>adjust for blood leukocyte subtypes, including CD4+ T-cells, CD8+ T-cells, natural killer cells, B-cells, and monocytes, in addition to germline and environmental factors shared between monozygotic co-twins

<sup>3</sup>adjust for blood leukocyte subtypes and age, including CD4+ T-cells, CD8+ T-cells, natural killer cells, B-cells, and monocytes, in addition to germline and environmental factors shared between monozygotic co-twins

<sup>4</sup>Benjamini–Hochberg False Discovery Rate (B-H FDR) <0.01

<sup>5</sup>the number of directionally consistent DhMRs among models 1, 2, and 3

**Supplementary Table S4. Evaluation of the 102 differentially hydroxymethylated regions among dizygotic twin pairs discordant for cardiovascular death using the binary linear classifier**

|                                         | <b>N</b> | <b>Sensitivity</b> | <b>Specificity</b> | <b>Positive<br/>predictive value</b> | <b>Negative<br/>predictive value</b> | <b>Accuracy</b> |
|-----------------------------------------|----------|--------------------|--------------------|--------------------------------------|--------------------------------------|-----------------|
| <b>CVD-dDZ</b>                          | 19 pairs | 89.5%              | 63.2%              | 70.8%                                | 85.7%                                | 76.3%           |
| <b>CVD-dMZ</b>                          | 19 pairs | 68.4%              | 52.6%              | 59.1%                                | 62.5%                                | 60.5%           |
| <b>CVD-dDZ and CVD-dMZ<br/>combined</b> | 38 pairs | 78.9%              | 57.9%              | 65.2%                                | 73.3%                                | 68.4%           |

**Abbreviations:** CVD=cardiovascular death; CVD-dMZ= monozygotic twin pairs discordant for cardiovascular death; CVD-dDZ= dizygotic twin pairs discordant for cardiovascular death

# Supplementary Figure S1: Up to top five biological functions and pathways from bioinformatic analysis of genes mapped to differentially hydroxymethylated regions (DhMRs) with Enrichr<sup>1</sup>

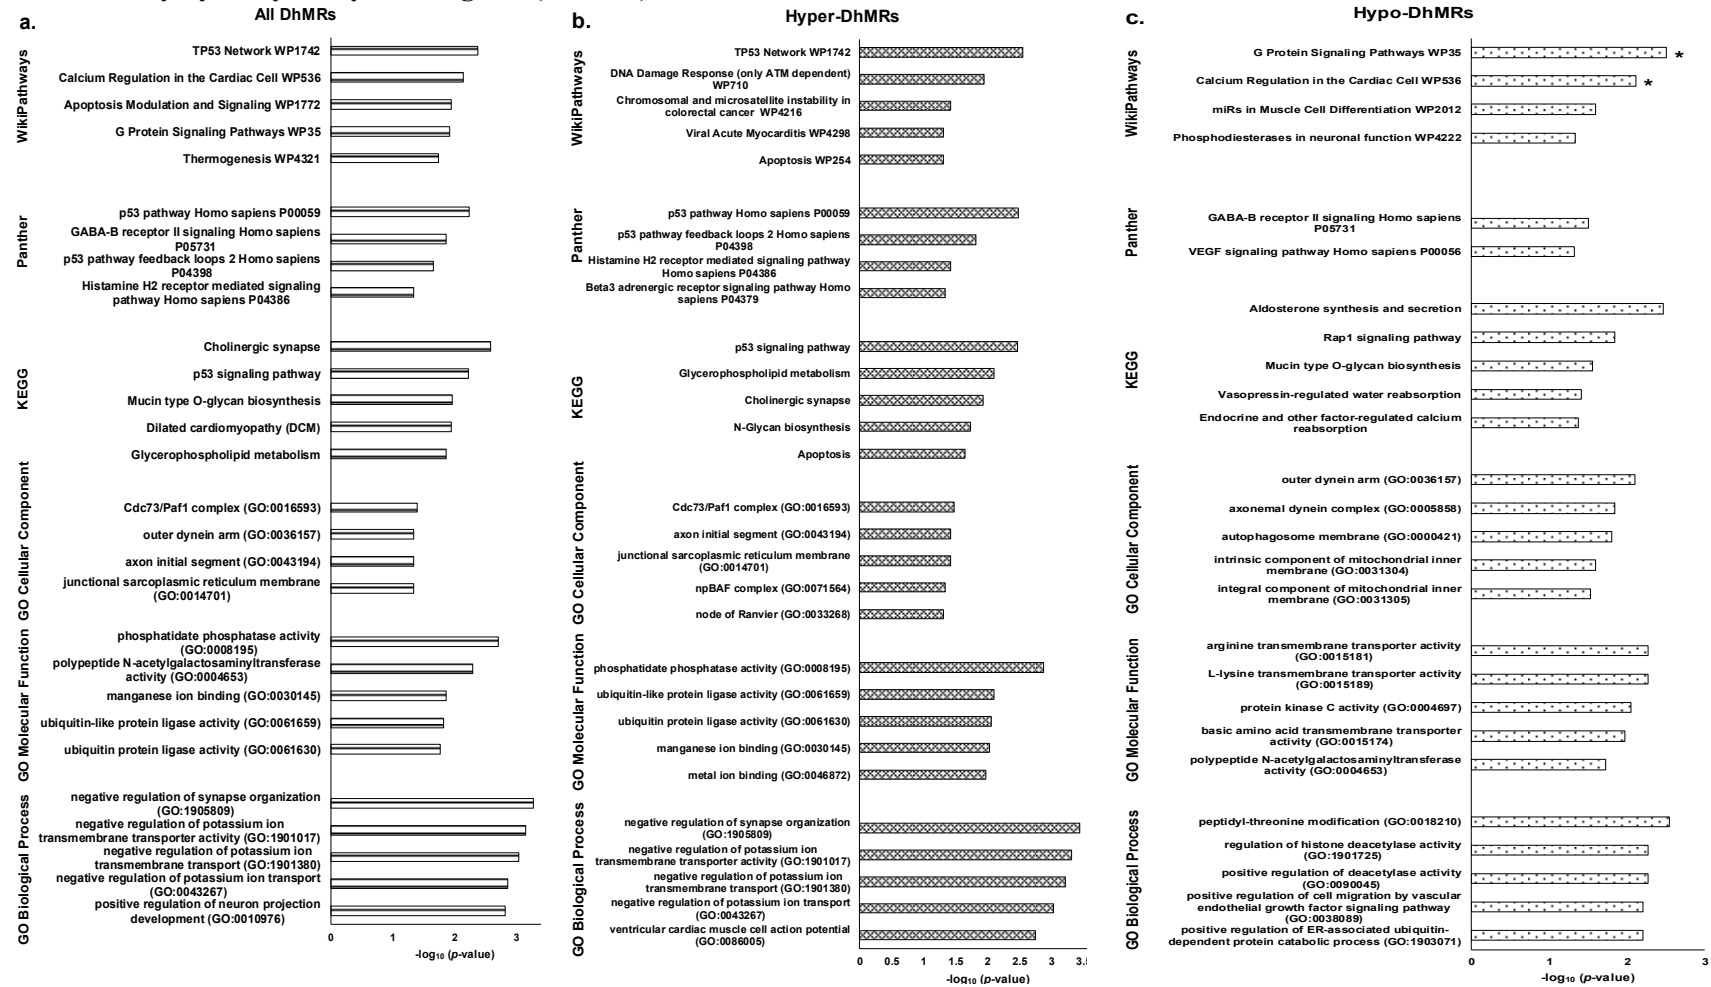

<sup>1</sup> up to top 5 enriched terms with the smallest nominal  $p$ -values  $< 0.05$ . \* $p_{adj} < 0.05$ , multiple-testing adjusted  $p$ -value using the Benjamini-Hochberg False Discovery Rate (FDR) procedure

DhMRs= differentially hydroxymethylated regions; hyper-DhMRs= differentially hyper-hydroxymethylated regions (case vs. control twins); hypo-DhMRs= differentially hypo-hydroxymethylated regions (case vs. control twins)

**Supplementary Figure S2: Up to top five phenotypes, disorders, and diseases from bioinformatic analysis of genes mapped to differentially hydroxymethylated regions (DhMRs) with Enrichr<sup>1</sup>**

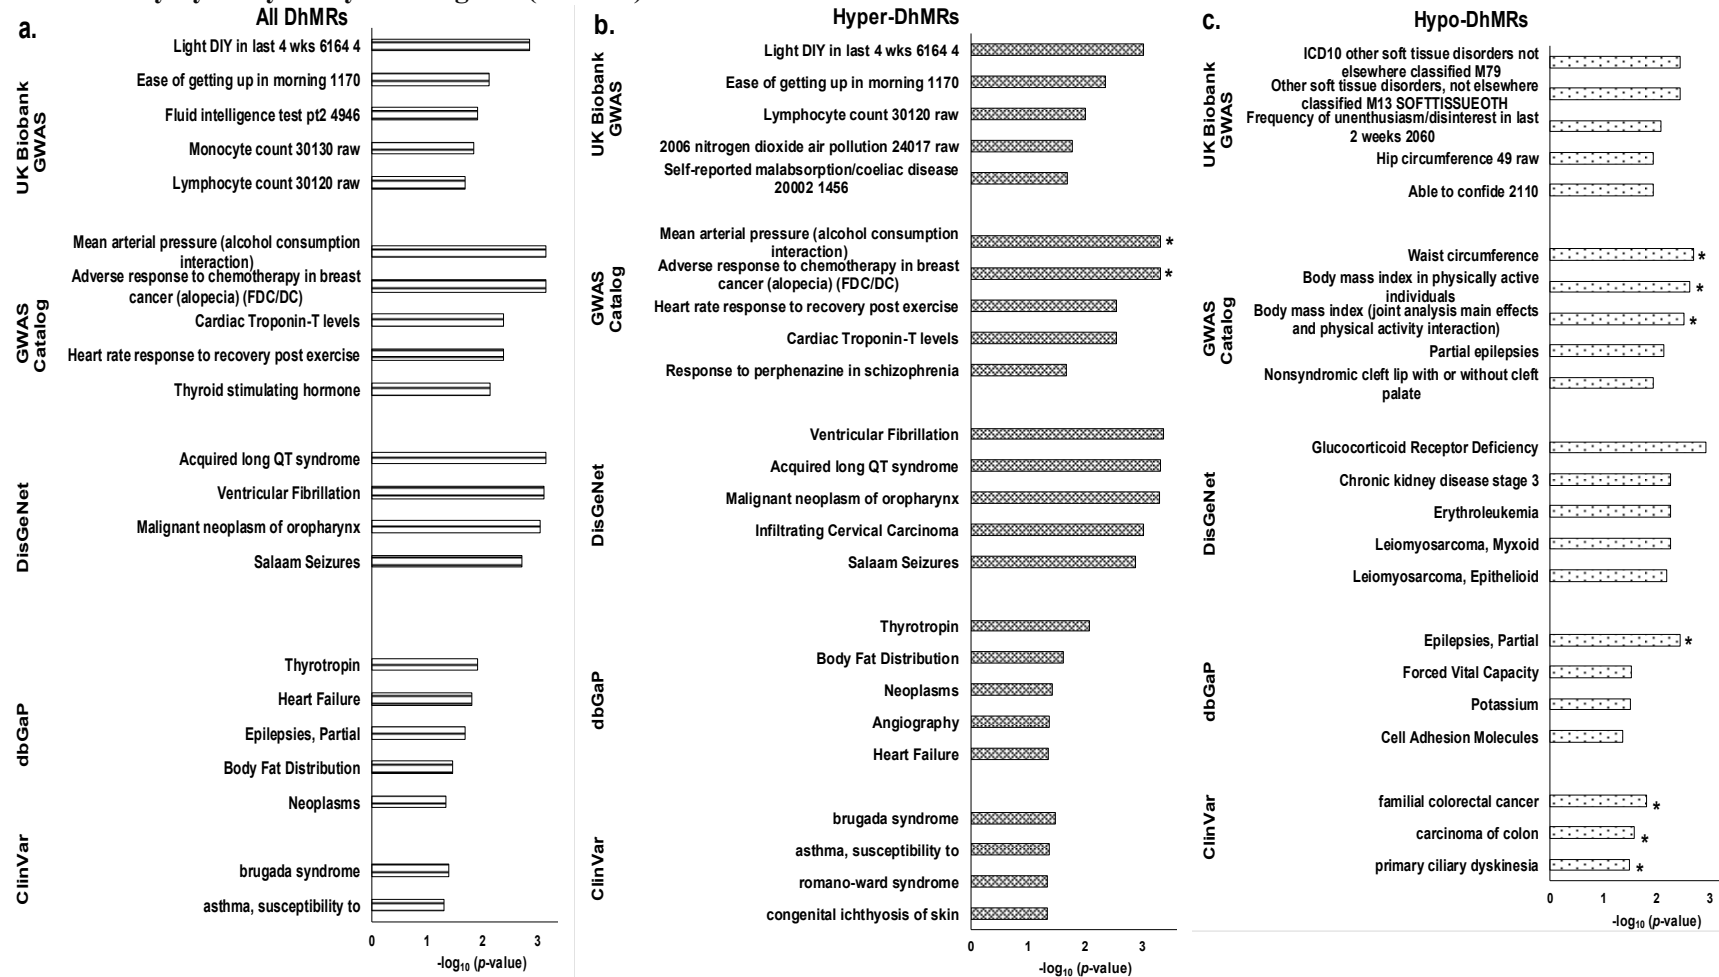

<sup>1</sup> up to top 5 enriched terms with the smallest nominal  $p$ -values  $< 0.05$ . \* $p_{adj} < 0.05$ , multiple-testing adjusted  $p$ -value using the Benjamini-Hochberg False Discovery Rate (FDR) procedure

DhMRs= differentially hydroxymethylated regions; hyper-DhMRs= differentially hyper-hydroxymethylated regions (case vs. control twins); hypo-DhMRs= differentially hypo-hydroxymethylated regions (case vs. control twins)

**Supplementary Figure S3: Up to top five rare diseases/disorders from bioinformatic analysis of genes mapped to differentially hydroxymethylated regions (DhMRs) with Enrichr<sup>1</sup>**

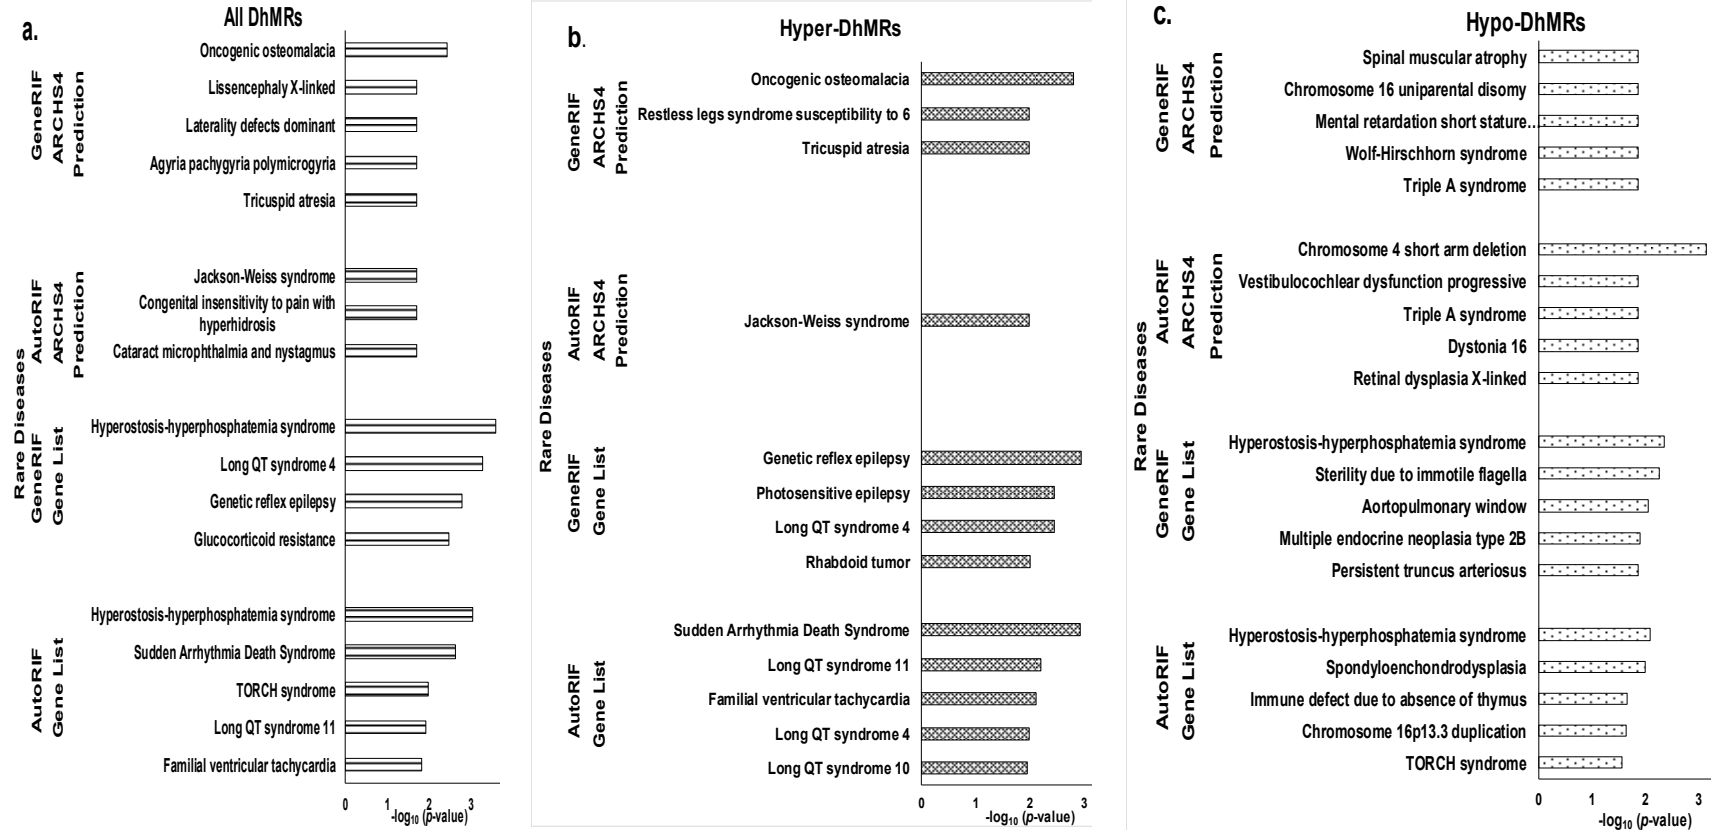

<sup>1</sup> up to top 5 enriched terms with the smallest nominal  $p$ -values < 0.05.

DhMRs= differentially hydroxymethylated regions; hyper-DhMRs= differentially hyper-hydroxymethylated regions (case vs. control twins); hypo-DhMRs= differentially hypo-hydroxymethylated regions (case vs. control twins)
